# Supplementary material
Source: PubMed Central journal article supplement (PMC1661741)
Supplement: bmj_333_7578_1114__1.pdf [file bmj_333_7578_1114__1.pdf]

## Published as supplied by the author

- w1 Schmitz C, Lindpainter K, Verhoef P, Gaziano JM, Buring J. Genetic polymorphism of methylenetetrahydrofolate reductase and myocardial infarction: a case-control study. *Circulation* 1996;**94**:1812-14
- w2 Chambers JC, Ireland H, Thompson E, Reilly P, Obeid OA, Refsum H, et al. Methylenetetrahydrofolate reductase 677 C→T mutation and coronary heart disease in UK Indian Asians. *Arterioscler Thromb Vasc Biol* 2000;**20**:2448-52
- w3 Meisel C, Cascorbi I, Gerloff T, Stangl V, Laule M, Müller J, et al. Identification of six methylenetetrahydrofolate reductase (MTHFR) genotypes resulting from common polymorphisms: impact on plasma homocysteine levels and development of coronary artery disease. *Atherosclerosis* 2001;**154**:651-8
- w4 Malinow MR, Nieto FJ, Kruger WD, Duell PB, Hess DL, Gluckman RA, et al. The effects of folic acid supplementation on plasma total homocysteine are modulated by multivitamin use and methylenetetrahydrofolate reductase genotypes. *Arterioscler Thromb Vasc Biol* 1997;**17**:1157-62
- w5 Hanson NQ, Aras O, Yang F and Tsai MY. C677T and A1298C polymorphisms of the methylenetetrahydrofolate reductase gene: incidence and effect of combined genotypes on plasma fasting and post-methionine load homocysteine in vascular disease. *Clinical Chem* 2001;**47**:661-6
- w6 Kim C-H, Hwang K-Y, Choi T-M, Shin W-Y, Hong S-Y. The methylenetetrahydrofolate reductase gene polymorphism in Koreans with coronary artery disease. *Int J Cardiol* 2001;**78**:13-17
- w7 Kölling K, Ndrepepa G, Koch W, Braun S, Mehilli J, Schomig A, Kastrati A. Methylenetetrahydrofolate reductase gene C677T and A1298C polymorphisms, plasma homocysteine, folate, and vitamin B12 levels and the extent of coronary artery disease. *Am J Cardiol* 2004;**93**:1201-6
- w8 Gończy I, Gończy J, Suliga M and Ciechanowicz A. C677T gene polymorphism of the methylenetetrahydrofolate reductase (MTHFR) in patients with myocardial infarction. *Polskie Archiwum Medycyny Wewnętrznej* 1999;**4**:849-854
- w9 Ma J, Stampfer MJ, Hennekens CH, Frosst P, Selhub J, Horsford J, et al. Methylenetetrahydrofolate reductase polymorphism, plasma folate, homocysteine and risk of myocardial infarction in US physicians. *Circulation* 1996;**94**:2410-6
- w10 Christensen B, Frosst P, Lussier-Cacan S, Selhub J, Goyette P, Rosenblatt DS, et al. Correlation of a common mutation in the methylenetetrahydrofolate reductase gene with plasma homocysteine in patients with premature coronary artery disease. *Arterioscler Thromb Vasc Biol* 1997;**17**:569-73. 27

- w11 Schwartz SM, Siscovick DS, Malinow MR, Rosendaal FR, Beverly RK, Hess DL, et al. Myocardial infarction in young women in relation to plasma total homocysteine, folate, and a common variant in the methylenetetrahydrofolate reductase gene. *Circulation* 1997;**96**:412-7
- W12 Kluijtmans LAJ, Kastelein JJP, Lindemans J, Boers GHJ, Heil SG, Bruschke AVG, et al. Thermolabile methylenetetrahydrofolate reductase in coronary artery disease. *Circulation* 1997;**96**:2573-7
- W13 Nakai K, Fusazaki T, Suzuki T, Ohsawa M, Kamata J, Kawazoe K, et al. Genetic polymorphism of 5,10-methylenetetrahydrofolate increases risk of myocardial infarction and is correlated to elevated levels of homocysteine in the Japanese general population. *Coron Artery Dis* 2000;**11**:47-51
- w14 Tanis BC, Blom HJ, Bloemenkamp DG, van den Bosch MA, Algra A, van der Graaf Y, Rosendaal FR. Folate, homocysteine levels, methylenetetrahydrofolate reductase (MTHFR) 677C--> T variant, and the risk of myocardial infarction in young women: effect of female hormones on homocysteine levels. *J Thromb Haemost* 2004;**2**:35-41
- w15 Ou T, Kobayashi Y, Yamakawa K, Arinami T, Amemiya H, Fujiwara H, et al. Methylenetetrahydrofolate reductase and apolipoprotein E polymorphisms are independent risk factors for coronary heart disease in Japanese: a case control study. *Atherosclerosis* 1998;**137**:23-8
- w16 Jang Y, Park HY, Lee JH, Ryu HJ, Kim JY, Kim OY. A polymorphism of the methylenetetrahydrofolate reductase and methionine synthase gene in CAD patients: association with plasma folate, vitamin B12 and homocysteine. *Nutri Res* 2002;**22**:965-76.
- w17 Verhoef P, Rimm EB, Hunter DJ, Chen J, Willett WC, Kelsey K, et al. A common mutation in the methylenetetrahydrofolate reductase gene and risk of coronary heart disease: results among US men. *J Am Coll Cardiol* 1998;**32**:253-9
- w18 Tokgozoglu SL, Alikasifoglu M, Unsal I, Atalar E, Aytemir K, Ozer N, et al. Methylenetetrahydrofolate reductase genotype and the risk and extent of coronary artery disease in a population with low plasma folate. *Heart* 1999;**81**:518-22
- w19 Kawashiri M, Kajinami K, Nohara A, Yagi K, Inazu A, Koizumi J, et al. Effect of common methylenetetrahydrofolate reductase gene mutation on coronary artery disease in familial hypercholesterolaemia. *Am J Cardiol* 2000;**86**:840-5
- w20 McIlroy SP, Dynan KB, Lawson JT, Patterson CC, Passmore AP. Moderately elevated plasma homocysteine, methylenetetrahydrofolate reductase genotype, and risk for stroke, vascular dementia, and alzheimer disease in Northern Ireland. *Stroke* 2002;**33**:2351-6

- w21 Kostulas K, Crisby M, Huang W-X, Lannfelt L, Hagenfeldt L, Eggerstsen G, et al. A methylenetetrahydrofolate reductase gene polymorphism in ischaemic stroke and in carotid artery stenosis. *Eur J Clin Invest* 1998;**28**:285-9
- w22 Li Z, Sun L, Zhang H, Liao Y, Wang D, Zhao B, et al. Elevated plasma homocysteine was associated with hemorrhagic and ischemic stroke, but methylenetetrahydrofolate reductase gene C677T polymorphism was a risk factor for thrombotic stroke. *Stroke* 2003;**34**:2085-90
- w23 Markus HS, Ali N, Swaminathan R, Sankaralingam A, Molloy J, Powell J. A common polymorphism in the methylenetetrahydrofolate reductase gene, homocysteine, and ischemic cerebrovascular disease. *Stroke* 1997;**28**:1739-43
- w24 Lalouschek W, Aull S, Serles W, Schnider P, Mannhalter C, Lang T, et al. Genetic and nongenetic factors influencing plasma homocysteine levels in patients with ischemic cerebrovascular disease and in healthy control subjects. *J Lab Clin Med* 1999;**133**:575-82
- w25 Eikelboom JW, Hankey GJ, Anand SS, Lofthouse E, Staples N, Baker RI, et al. Association between high homocyst(e)ine and ischemic stroke due to large- and small-artery disease but not other etiologic subtypes of ischemic stroke. *Stroke* 2000;**31**:1069-75
- w26 Hassan A, Hunt BJ, O'Sullivan M, Bell R, D'Souza R, Jeffery S, et al. Homocysteine is a risk factor for cerebral small vessel disease. *Brain* 2004;**127**:212-9
- w27 Nakata Y, Katsuya T, Takami S, Sato N, Fu Y, Ishikawa K, et al. Methylenetetrahydrofolate reductase gene polymorphism relation to blood pressure and cerebrovascular disease. *Am J Hypertens* 1998;**11**:1019-23
- w28 Morita H, Kurihara H, Tsubaki S, Sugiyama T, Hamada C, Kurihara Y, et al. Methylenetetrahydrofolate reductase gene polymorphism and ischemic stroke in Japanese. *Arterioscler Thromb Vasc Biol* 1998;**18**:1465-9
- w29 Press RD, Beamer N, Evans A, DeLoughery TG, Coull BM. Role of a common mutation in the homocysteine regulatory enzyme methylenetetrahydrofolate reductase in ischemic stroke. *Diagn Mol Pathol* 1999;**8**:54-8
- w30 Gaustadnes M, Rüdiger N, Møller J, Rasmussen K, Larsen TB, Ingerslev J. Thrombophilic predisposition in stroke and venous thromboembolism in Danish patients. *Blood Coag Fibrinol* 1999;**10**:251-9
- w31 Madonna P, de Stefano V, Coppola A, Cirillo F, Cerbone AM, Orefice G, et al. Hyperhomocysteinemia and other inherited prothrombotic conditions in young adults with a history of ischemic stroke. *Stroke* 2002;**33**:51-6
- w32 Huang Y, Zhao YL, Ki S. Hyperhomocysteine, methylenetetrahydrofolate reductase gene, and other risk factors in ischemic stroke. *Natl Med J China* 2002;**82**:119-22
